# Supplementary material for: Glycemia Determines the Effect of Type 2 Diabetes Risk Genes on Insulin Secretion
Source: PubMed Central journal article supplement — Diabetes. 2010 Aug 29;59(12):3247–52. doi: 10.2337/db10-0674 (PMC2992789; doi:10.2337/db10-0674), 2010-08-29
Supplement: supp_db10-0674_db100674onlineappendix.pdf [file supp_db10-0674_db100674onlineappendix.pdf]

## ONLINE APPENDIX

### **Glycemia determines the effect of type 2 diabetes risk genes on insulin secretion**

Martin Heni<sup>1\*</sup>, Caroline Ketterer<sup>1\*</sup>, Claus Thamer<sup>1</sup>, Silke A. Herzberg-Schäfer<sup>1</sup>,  
Martina Guthoff<sup>1</sup>, Norbert Stefan<sup>1</sup>, Fausto Machicao<sup>1</sup>, Harald Staiger<sup>1</sup>, Andreas Fritsche<sup>1</sup>,  
Hans-Ulrich Häring<sup>1</sup>

- 1) Department of Internal Medicine, Division of Endocrinology, Diabetology, Angiology, Nephrology and Clinical Chemistry, Eberhard Karls University Tübingen, Member of the German Centre for Diabetes Research (DZD), Tübingen, Germany

\* M. Heni and C. Ketterer contributed equally to this work.

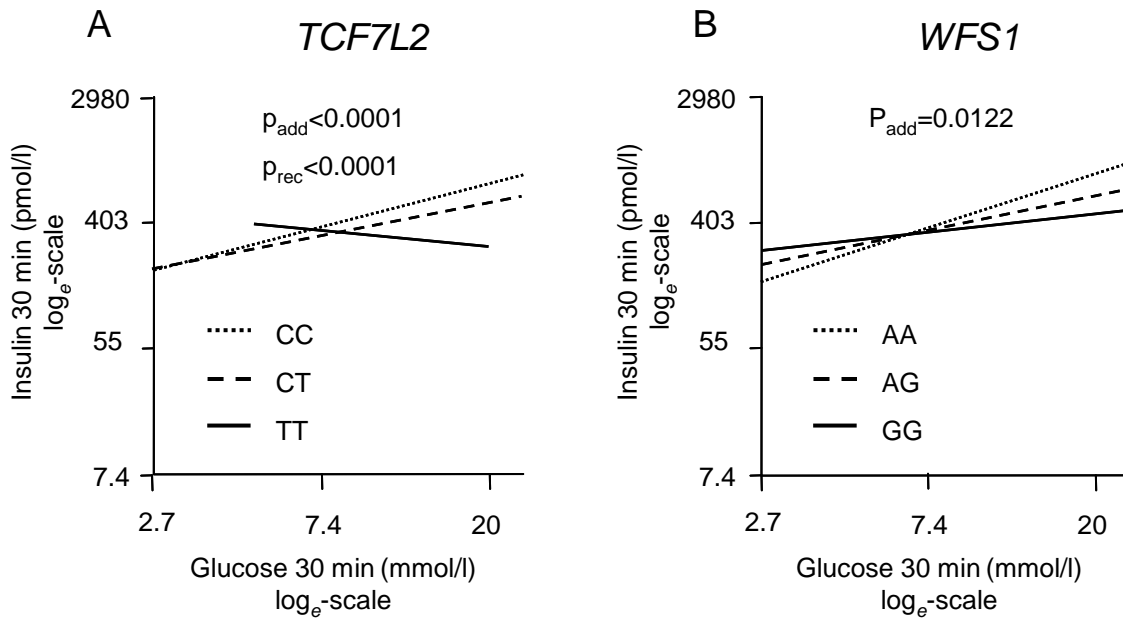

**Supplemental figure 1** Association between insulin levels at 30 minutes of the OGTT and glucose levels at 30 minutes during the OGTT by *TCF7L2* SNP rs7903146 (A) and *WFS1* SNP rs10010131 (B). Lines represent regression lines.

Data were  $\log_e$ -transformed prior to statistical analysis. Insulin data were adjusted for gender, age, and BMI by multivariate linear regression analysis.

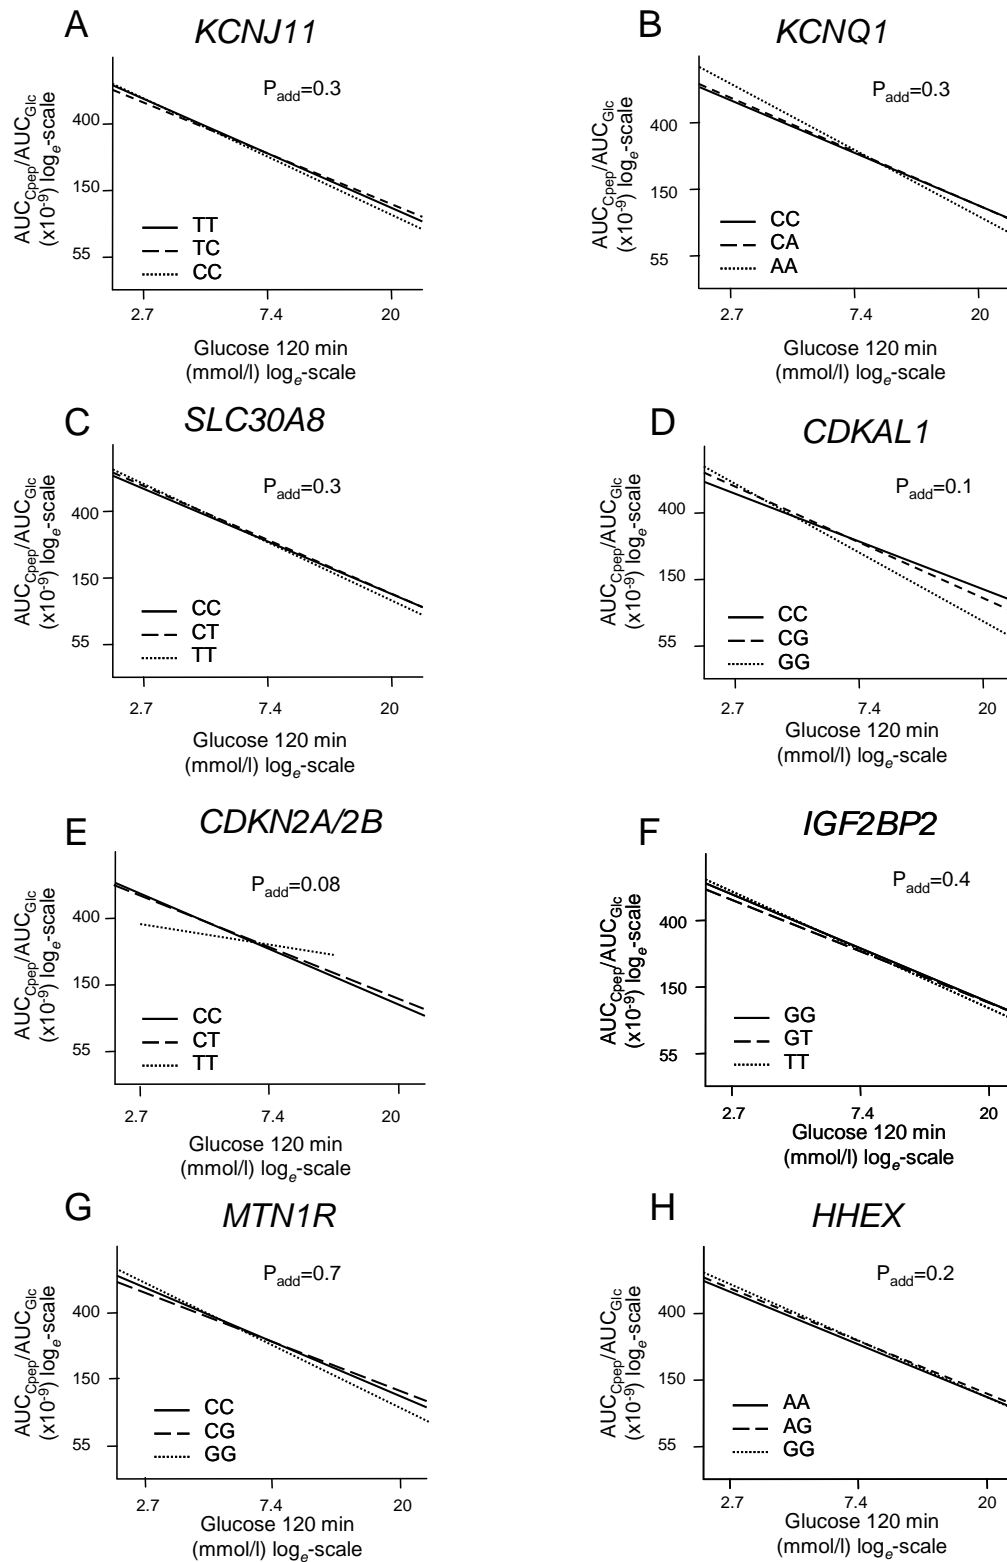

**Supplemental figure 2** Association between  $AUC_{C_{\text{pep}}}/AUC_{Glc}$  and Glucose 120 min by genotypes.

Shown are data for rs5215 (*KCNJ11*, **A**), rs151290 (*KCNQ1*, **B**), rs13266634 (*SLC30A8*, **C**), rs7754840 (*CDKAL1*, **D**), rs10811661 (*CDKN2A/2B*, **E**), rs4402960 (*IGF2BP2*, **F**), rs10830963 (*MTNR1B*, **G**), and rs7923837 (*HHEX*, **H**).

Lines represent regression lines. Data were  $\log_e$ -transformed prior to statistical analysis and adjusted for gender, age, BMI, and OGTT-derived insulin sensitivity index by multivariate linear regression analysis.

**Supplemental table 1.** Clinical characteristics of the study population.

|                                 | Cross-sectional study | <i>TCF7L2</i><br>rs7903146<br>(Lifestyle<br>intervention) | Lifestyle<br>intervention<br>study baseline | Lifestyle<br>intervention<br>study follow<br>up | P Change<br>during<br>lifestyle<br>inter-vention | P Difference<br>in change<br>between<br><i>TCF7L2</i><br>genotype |
|---------------------------------|-----------------------|-----------------------------------------------------------|---------------------------------------------|-------------------------------------------------|--------------------------------------------------|-------------------------------------------------------------------|
| Gender (female / male)          | 1025/529              |                                                           | 197/118                                     |                                                 |                                                  |                                                                   |
| NGT / IFG / IGT / IFG&IGT / DIA | 1079/143/138/112/82   |                                                           | 186/39/45/41/4                              | 244/0/41/25/5                                   | <0.0001                                          |                                                                   |
| Age (y)                         | 40±13                 |                                                           | 46±11                                       |                                                 |                                                  |                                                                   |
| BMI (kg/m <sup>2</sup> )        | 28.6±7.9              |                                                           | 30.1±5.6                                    | 29.2±5.6                                        | <0.0001                                          |                                                                   |
| Fasting insulin (pM)            | 65±58                 |                                                           | 62±37                                       | 53±33                                           | <0.0001                                          |                                                                   |
| Fasting glucose (mM)            | 5.2±0.8               | CC (n=156)<br>XT (n=159)                                  | 5.2±0.5<br>5.3±0.5                          | 5.1±0.5<br>5.2±0.6                              | <0.0001<br>0.04                                  | p=0.2*                                                            |
| Glucose, 120min OGTT (mM)       | 6.5±2.1               | CC (n=156)<br>XT (n=159)                                  | 6.9±1.6<br>7.2±1.7                          | 6.6±1.5<br>6.9±1.8                              | 0.03<br>0.006                                    | p=0.9*                                                            |

Values are given as mean ± SD

\*Difference in change of parameter between *TCF7L2* genotype is calculated using a multivariate linear model including, age, gender, change in BMI and baseline value of the parameter
